# Supplementary material for: Molecular identification of Sarcocystis halieti n. sp., Sarcocystis lari and Sarcocystis truncata in the intestine of a white-tailed sea eagle (Haliaeetus albicilla) in Norway
Source: PubMed Central journal article supplement — Int J Parasitol Parasites Wildl. 2017 Dec 8;7(1):1–11. doi: 10.1016/j.ijppaw.2017.12.001 (PMC5730365; doi:10.1016/j.ijppaw.2017.12.001), 2017-12-08
Supplement: mmc1.pdf [file mmc1.pdf]

## Supplementary material

### Molecular identification of *Sarcocystis haliyeti* n. sp., *Sarcocystis lari* and *Sarcocystis truncata* in the intestine of a white-tailed sea eagle (*Haliaeetus albicilla*) in Norway

Bjørn Gjerde<sup>\*a</sup>, Turid Vikøren<sup>b</sup>, Inger Sofie Hammes<sup>b</sup>

<sup>a</sup> Norwegian University of Life Sciences, Faculty of Veterinary Medicine, Department of Food Safety and Infection Biology, P.O. Box 8146 Dep., 0033 Oslo, Norway

<sup>b</sup> Norwegian Veterinary Institute, Ullevålsveien 68, P.O. Box 750 Sentrum, 0106 Oslo, Norway

E-mail addresses: bjorn.gjerde@nmbu.no (B. Gjerde), turid.vikoren@vetinst.no (T. Vikøren), inger.hammes@vetinst.no (I.S. Hammes)

\* Corresponding author.

**Table S1**

Primers used to amplify the four DNA regions examined in the present study.

| DNA region    | Primer name      | Primer sequence                    | References                |
|---------------|------------------|------------------------------------|---------------------------|
| 18S rRNA gene | ERIB1            | ACC TGG TTG ATC CTG CCA G          | Barta et al., 1997        |
|               | S2r              | CTG ATC GTC TTC GAG CCC CTA        | Fischer and Odening, 1998 |
|               | S3f              | TTG TTA AAG ACG AAC TAC TGC G      | Fischer and Odening, 1998 |
|               | Primer BSarc     | GAT CCT TCC GCA GGT TCA CCT AC     | Gjerde, 2014a             |
|               | A1F              | CAC ATA CCT CTT CCC TCG TG         | This study                |
|               | A2F              | ATC CTC CTG ATT GGT GTC ATC        | This study                |
|               | A2R              | AAT GAA GTG ATG ATG ACA CCA ATC    | This study                |
| ITS1          | SU1F             | GAT TGA GTG TTC CGG TGA ATT ATT    | Gjerde, 2014b             |
|               | 5.8SR2           | AAG GTG CCA TTT GCG TTC AGA A      | Gjerde, 2014b             |
| 28S rRNA gene | KL1              | TAC CCG CTG AAC TTA AGC            | Mugridge et al., 1999     |
|               | KL3              | CCA CCA AGA TCT GCA CTA G          | Mugridge et al., 1999     |
| cox1          | SF1              | ATG GCG TAC AAC AAT CAT AAA GAA    | Gjerde, 2013              |
|               | SR5              | TAG GTA TCA TGT AAC GCA ATA TCC AT | Gjerde, 2013              |
|               | SF4 <sup>a</sup> | TAC TTA CGG CNG GYA TCT TTA G      | Gjerde et al., 2017       |
|               | SR8D             | CAT TGC CCA TDA CTA CGC C          | Gjerde, 2013              |

<sup>a</sup> The sequence of primer SF4 was unfortunately given in its reverse complementary form in Table S2 of the Supplementary material of Gjerde et al., 2017.

#### References for primers

- Barta, J.R., Martin, D.S., Liberator, P.A., Dashkevich, M., Anderson, J.W., Feighner, S.D., Elbrecht, A., Perkins-Barrow, A., Jenkins, M.C., Danforth, H.D., Ruff, M.D., Profous-Juchelka, H., 1997. Phylogenetic relationships among eight *Eimeria* species infecting domestic fowl inferred using complete small subunit ribosomal DNA sequences. *J. Parasitol.* 83, 262–271. <http://dx.doi.org/10.2307/3284453>.
- Fischer, S., Odening, K., 1998. Characterization of bovine *Sarcocystis* species by analysis of their 18S ribosomal DNA sequences. *J. Parasitol.* 84, 50–54. <http://dx.doi.org/10.2307/3284529>.
- Gjerde, B., 2013. Phylogenetic relationships among *Sarcocystis* species in cervids, cattle and sheep inferred from the mitochondrial cytochrome c oxidase subunit I gene. *Int. J. Parasitol.* 43, 579–591. <http://dx.doi.org/10.1016/j.ijpara.2013.02.004>.

- Gjerde, B., 2014a. Morphological and molecular characteristics of four *Sarcocystis* spp. in Canadian moose (*Alces alces*), including *Sarcocystis taeniata* n. sp. Parasitol. Res. 113, 1591–1604. <http://dx.doi.org/10.1007/s00436-014-3806-z>.
- Gjerde, B., 2014b. Molecular characterisation of *Sarcocystis rileyi* from a common eider (*Somateria mollissima*) in Norway. Parasitol. Res. 113, 3501–3509. <http://dx.doi.org/10.1007/s00436-014-4062-y>.
- Gjerde, B., Giacomelli, S., Bianchi, A., Bertolotti, I., Mondani, H., Gibelli, L.R., 2017. Morphological and molecular characterization of four *Sarcocystis* spp., including *Sarcocystis linearis* n. sp., from roe deer (*Capreolus capreolus*) in Italy. Parasitol. Res. 116, 1317–1338. <http://dx.doi.org/10.1007/s00436-017-5410-5>.
- Mugridge, N.B., Morrison, D.A., Johnson, A.M., Luton, K., Dubey, J.P., Votýpka, J., Tenter, A.M., 1999. Phylogenetic relationships of the genus *Frenkelia*: a review of its history and new knowledge gained from comparison of large subunit ribosomal ribonucleic acid gene sequences. Int. J. Parasitol. 29, 957–972. [http://doi.org/10.1016/S0020-7519\(99\)00062-4](http://doi.org/10.1016/S0020-7519(99)00062-4).

**Table S2**

Identity of the new *cox1* sequences of *S. halioti* (GenBank acc. no. MF946583) and *S. lari* (GenBank acc. no. MF946584) with the most similar sequences available in GenBank (as of October 2017).

| Species                                      | GenBank acc. no.                        | <i>S. halioti</i>    | <i>S. lari</i>       |
|----------------------------------------------|-----------------------------------------|----------------------|----------------------|
| <i>S. halioti</i>                            | MF946583                                |                      | 1051/1053 nt (99.8%) |
| <i>S. lutrae</i>                             | KM657808–KM657809;<br>KF601326–KF601327 | 1051/1053 nt (99.8%) | 1053/1053 (100%)     |
| <i>S. turdusi</i>                            | KT588511–KT588518                       | 1051/1053 nt (99.8%) | 1049/1053 nt (99.6%) |
| <i>S. jamaicensis</i>                        | KY995652                                | 1050/1053 nt (99.7%) | 1050/1053 nt (99.7%) |
| <i>S. arctica</i>                            | KF601318–KF601324                       | 1045/1053 nt (99.2%) | 1047/1053 nt (99.4%) |
| <i>S. canis</i>                              | KX721495                                | 1044/1053 nt (99.1%) | 1046/1053 nt (99.3%) |
| <i>S. strixi</i>                             | MF162317                                | 1038/1045 nt (99.3%) | 1040/1045 nt (99.5%) |
| <i>S. speeri</i>                             | KT207461                                | 1040/1052 nt (98.9%) | 1042/1052 nt (99.0%) |
| <i>S. neurona</i>                            | EST contig <sup>a</sup>                 | 1041/1052 nt (98.9%) | 1043/1053 nt (99.1%) |
| <i>S. calchasi</i>                           | KU220952                                | 626/626 nt (100%)    | 625/626 nt (99.8%)   |
| <i>Sarcocystis</i> sp. ex <i>A. cooperii</i> | KY348756                                | 899/900 nt (99.9%)   | 899/900 nt (99.9%)   |
| <i>S. rileyi</i>                             | KJ396582                                | 1021/1053 nt (97.0%) | 1021/1053 nt (97.0%) |

<sup>a</sup> The *cox1* sequence (1,095 bp) of *S. neurona* was artificially concatenated from expressed sequence tags (ESTs) downloaded from GenBank as described by Gjerde and Schulze, 2014 (Parasitol. Res. 113, 811–821. <http://dx.doi.org/10.1007/s00436-013-3711-x>). The sequence is available in the Supplementary material of that paper.

**Fig. S1.** Phylogenetic tree for members of the Sarcocystidae based on 58 sequences of the near complete 18S rRNA gene of 56 taxa and inferred using the maximum likelihood method based on the Hasegawa–Kishino–Yano model with gamma distribution and invariable sites. The percentage of replicate trees in which the associated taxa clustered together in the bootstrap test (1,000 replicates) is shown next to the branches. The two new sequences from the present study are in boldface.

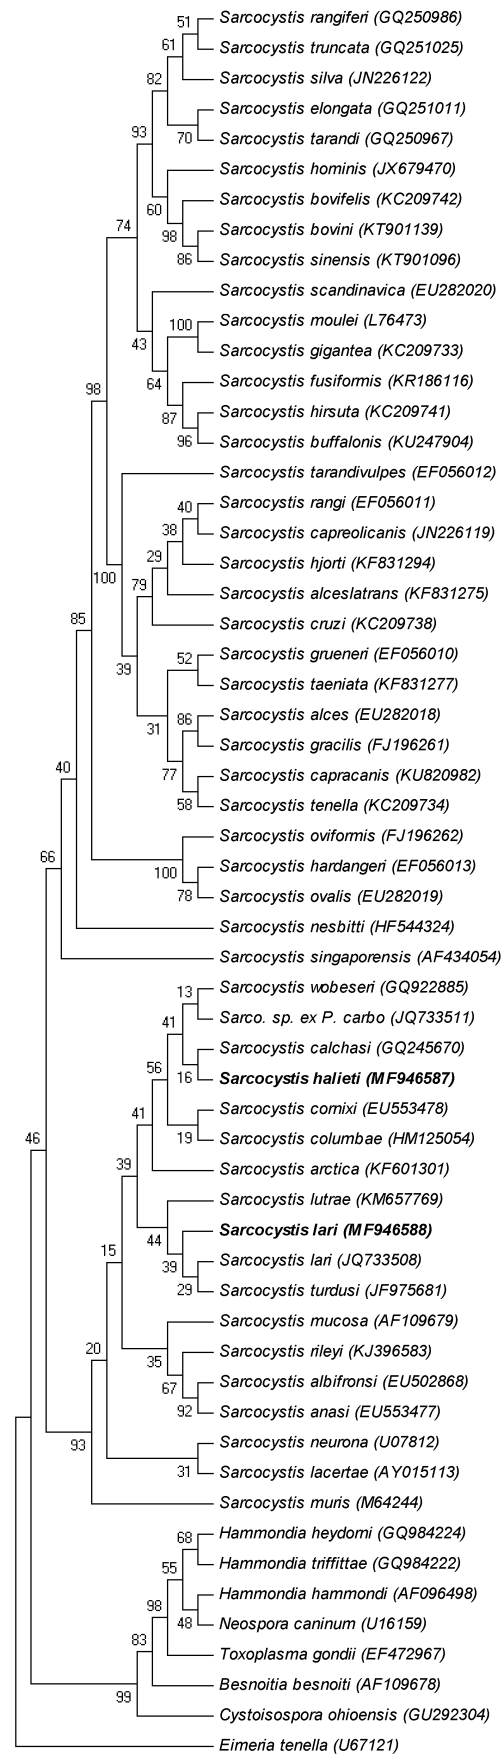

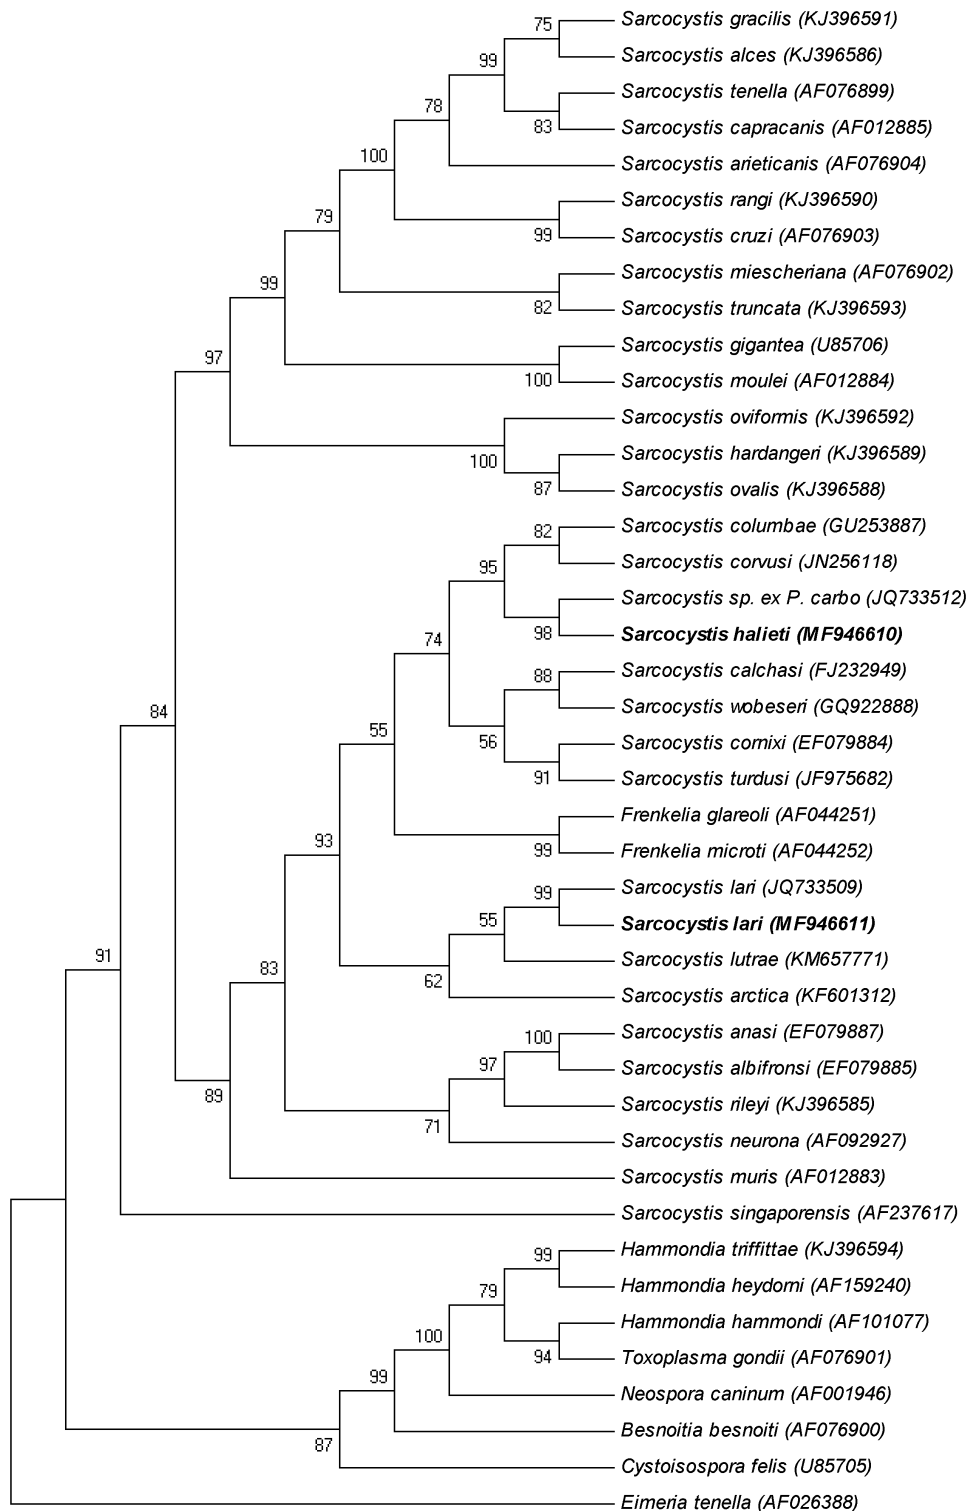

**Fig. S2.** Phylogenetic tree for members of the Sarcocystidae based on 42 sequences of the partial 28S rRNA gene of 40 taxa and inferred using the maximum parsimony method with the Tree-Bisection-Regrafting algorithm. The percentage of replicate trees in which the associated taxa clustered together in the bootstrap test (1,000 replicates) is shown next to the branches. The two new sequences from the present study are in boldface.
